# Supplementary material for: Multigene testing of moderate-risk genes: be mindful of the missense
Source: HighWire-hosted journal article supplement (doi:10.1136/jmedgenet-2015-103398), 2016-01-19
Supplement: jmedgenet-2015-103398supp_tables.pdf [file jmedgenet-2015-103398supp_tables.pdf]

**Supplemental Table 1.** The list of variants with their respective scores for each variant classifier

| Gene | DNA                | Protein    | Align-GVGD           |                    | Polyphen-2 | CADD  | MAPP                 |                    | Frequency (ESP) | Domain |
|------|--------------------|------------|----------------------|--------------------|------------|-------|----------------------|--------------------|-----------------|--------|
|      |                    |            | Mammals <sup>a</sup> | 3 S/P <sup>b</sup> |            |       | Mammals <sup>a</sup> | 3 S/P <sup>b</sup> |                 |        |
| ATM  | c.136-139 del CATT | frameshift | FS                   | FS                 | 1          | 21.8  | 45.4                 | 45.4               | 0               | 1      |
| ATM  | c.170 G>A          | W57X       | X                    | X                  | 1          | 36    | 45.4                 | 45.4               | 0               | 1      |
| ATM  | c.295 A>G          | S99G       | Class C55            | Class C0           | 0.997      | 28.8  | 9.08                 | 2.41               | 0.000154        | 0      |
| ATM  | c.363 delA         | frameshift | FS                   | FS                 | 1          | 36    | 45.4                 | 45.4               | 0               | 1      |
| ATM  | c.544 G>C          | V182L      | Class C0             | Class C0           | 0.002      | 12.03 | 10.22                | 4.77               | 0.008004        | 0      |
| ATM  | c.936 A>C          | L312F      | Class C15            | Class C15          | 1          | 19.5  | 12.59                | 12.59              | 0               | 0      |
| ATM  | c.1229 T>C         | V410A      | Class C65            | Class C25          | 0.434      | 15.88 | 27.75                | 19.81              | 0.00177         | 0      |
| ATM  | c.G1464T           | W488C      | Class C65            | Class C65          | 0.653      | 14.15 | 29.05                | 29.05              | 0.000077        | 0      |
| ATM  | c.1810 C>T         | P604S      | Class C65            | Class C0           | 0.635      | 15.46 | 17.5                 | 4.5                | 0.004003        | 0      |
| ATM  | c.2021 A>G         | H674R      | Class C0             | Class C0           | 0          | 4.044 | 6.96                 | 3.51               | 0.000077        | 0      |
| ATM  | c.2158 C>T         | R720C      | Class C0             | Class C0           | 0          | 10.15 | 3.6                  | 2.92               | 0               | 0      |
| ATM  | c.2494 C>T         | R832C      | Class C0             | Class C0           | 0          | 9.764 | 1.91                 | 1.77               | 0.000154        | 0      |
| ATM  | c.3004 G>T         | G1002C     | Class C0             | Class C0           | 0.002      | 8.811 | 3.42                 | 6.66               | 0               | 0      |
| ATM  | c.3295 G>A         | D1099N     | Class C0             | Class C0           | 0.002      | 9.962 | 2.37                 | 1.39               | 0               | 0      |
| ATM  | c.3925 G>A         | A1309T     | Class C0             | Class C0           | 0.009      | 15.47 | 8.56                 | 4.95               | 0.001077        | 0      |
| ATM  | c.3963 G>A         | M1321I     | Class C0             | Class C0           | 0.003      | 9.956 | 6.1                  | 2.1                | 0               | 0      |
| ATM  | c.4388 T>G         | F1463C     | Class C65            | Class C65          | 1          | 24.2  | 17.91                | 17.91              | 0.001154        | 0      |
| ATM  | c.4424 G>T         | Y1475C     | Class C25            | Class C25          | 0.874      | 11.19 | 8.85                 | 8.45               | 0               | 0      |
| ATM  | c.4724 G>A         | R1575H     | Class C25            | Class C25          | 1          | 25.4  | 14.41                | 14.41              | 0               | 0      |
| ATM  | c.4949 A>G         | N1650S     | Class C0             | Class C0           | 0          | 2.775 | 1.05                 | 1.32               | 0.000077        | 0      |
| ATM  | c.5071 A>C         | S1691R     | Class C0             | Class C0           | 0.001      | 9.876 | 3.72                 | 4.19               | 0.002154        | 0      |
| ATM  | c.5089 A>G         | T1697A     | Class C0             | Class C0           | 0.001      | 2.424 | 17.04                | 3.2                | 0.000154        | 0      |
| ATM  | c.5267 C>G         | T1756R     | Class C15            | Class C0           | 0.054      | 8.393 | 33.46                | 2.63               | 0               | 0      |
| ATM  | c.5713 insT        | frameshift | FS                   | FS                 | 1          | 40    | 45.4                 | 45.4               | 0               | 1      |
| ATM  | c.5882 A>G         | Y1961C     | Class C65            | Class C65          | 1          | 23    | 23.02                | 23.02              | 0.000154        | 1      |
| ATM  | c.5890 A>G         | K1964E     | Class C15            | Class C0           | 0.053      | 12.9  | 20.1                 | 13.14              | 0               | 1      |
| ATM  | c.5906 A>T         | D1969V     | Class C35            | Class C0           | 0.242      | 13.97 | 25.01                | 5.76               | 0               | 1      |
| ATM  | c.5932 G>T         | E1978X     | X                    | X                  | 1          | 49    | 45.4                 | 45.4               | 0               | 1      |
| ATM  | c.5975 A>C         | K1992T     | Class C65            | Class C0           | 0.73       | 17.27 | 27.99                | 16.51              | 0.000231        | 1      |
| ATM  | c.6067 G>A         | G2023R     | Class C65            | Class C25          | 1          | 30    | 36.52                | 45.39              | 0.002308        | 1      |
| ATM  | c.6088 A>G         | I2030V     | Class C15            | Class C0           | 0          | 8.212 | 12.49                | 5.81               | 0.005001        | 1      |
| ATM  | c.6235 G>A         | V2079I     | Class C0             | Class C0           | 0.002      | 9.681 | 4.05                 | 2.45               | 0.006001        | 1      |
| ATM  | c.6437 G>C         | S2146T     | Class C0             | Class C0           | 0          | 0.87  | 2.16                 | 1.38               | 0.003925        | 1      |
| ATM  | c.6482 G>A         | R2161H     | Class C0             | Class C0           | 0.503      | 19.29 | 7.16                 | 6.29               | 0               | 1      |
| ATM  | c.6551 G>C         | S2184T     | Class C0             | Class C0           | 0.109      | 14.82 | 5.08                 | 2.65               | 0.000154        | 1      |
| ATM  | c.6574 T>G         | S2192P     | Class C65            | Class C0           | 0.015      | 4.401 | 39.26                | 4.22               | 0               | 1      |
| ATM  | c.6820 G>A         | A2274T     | Class C55            | Class C55          | 1          | 35    | 33.24                | 33.24              | 0               | 1      |

|       |                    |                       |           |           |       |       |       |       |          |   |
|-------|--------------------|-----------------------|-----------|-----------|-------|-------|-------|-------|----------|---|
| ATM   | c.6860 G>C         | G2287A                | Class C0  | Class C0  | 0.216 | 12.31 | 3.75  | 4.4   | 0.000077 | 1 |
| ATM   | c.6919 C>T         | L2307F                | Class C15 | Class C0  | 0.999 | 22.4  | 12.59 | 7.04  | 0.001846 | 1 |
| ATM   | c.6995 T>C         | L2332P                | Class C25 | Class C0  | 0.005 | 5.623 | 21.58 | 2.37  | 0.008463 | 1 |
| ATM   | c.6998 C>A         | T2333K                | Class C0  | Class C0  | 0.005 | 11.5  | 30.09 | 31.23 | 0.000077 | 1 |
| ATM   | c.7004 C>T         | T2335I                | Class C0  | Class C0  | 0.004 | 16.79 | 4.02  | 5.75  | 0.000231 | 1 |
| ATM   | c.7174 C>T         | R2392W                | Class C65 | Class C65 | 1     | 25.1  | 22.31 | 22.31 | 0.000231 | 1 |
| ATM   | c.7187 C>G         | T2396S                | Class C55 | Class C0  | 0.095 | 13.57 | 11.33 | 1.85  | 0.000231 | 1 |
| ATM   | c.7187C>G          | T2396S                | Class C55 | Class C0  | 0.095 | 13.57 | 11.33 | 1.85  | 0.000231 | 1 |
| ATM   | c.7271 T>G         | V2424G                | Class C65 | Class C65 | 1     | 26.1  | 23.22 | 23.22 | 0.000077 | 1 |
| ATM   | c.7271T>G          | V2424G                | Class C65 | Class C65 | 1     | 26.1  | 23.22 | 23.22 | 0.000077 | 1 |
| ATM   | c.7390 T>C         | C2464R                | Class C65 | Class C0  | 0.838 | 5.902 | 34.86 | 10.39 | 0.000462 | 1 |
| ATM   | c.7475 T>G         | L2492R                | Class C65 | Class C45 | 1     | 24    | 33.02 | 31.81 | 0.000077 | 1 |
| ATM   | c.7636_7644del9    | SRI2546_2548del3      | IFD       | IFD       | 1     | 19.45 | 40.7  | 34.66 | 0        | 1 |
| ATM   | c.7638-7646 del9   | RIS2547-2549del       | IFD       | IFD       | 1     | 19.45 | 40.7  | 41.72 | 0        | 1 |
| ATM   | c.7740 A>C         | R2580S                | Class C0  | Class C0  | 0.001 | 7.937 | 4.86  | 5.16  | 0        | 1 |
| ATM   | c.7775 C>G         | S2592C                | Class C65 | Class C65 | 1     | 17.69 | 20.41 | 20.41 | 0        | 1 |
| ATM   | c.7867 C>A         | L2623I                | Class C0  | Class C0  | 1     | 29.2  | 15.46 | 15.46 | 0        | 1 |
| ATM   | c.7870 T>G         | C2624G                | Class C65 | Class C65 | 0.999 | 23.8  | 15.41 | 15.41 | 0        | 1 |
| ATM   | c.7912 T>G         | W2638G                | Class C65 | Class C15 | 0.964 | 10.94 | 23.29 | 11.35 | 0        | 1 |
| ATM   | c.7999 A>G         | M2667V                | Class C15 | Class C0  | 0.179 | 13.49 | 30.01 | 7.51  | 0        | 1 |
| ATM   | c.8006 T>C         | I2669T                | Class C65 | Class C65 | 0.999 | 20.8  | 19.6  | 19.6  | 0        | 1 |
| ATM   | c.8011 -6 T>G      | NA                    | intronic  | intronic  | 0     | 2.559 | 0     | 0     | 0        | 0 |
| ATM   | c.8268_8268+4 del5 | splice donor deletion | splice    | splice    | 1     | 11.96 | 45.4  | 45.4  | 0        | 1 |
| ATM   | c.8269 -5 T>G      | splice                | splice    | splice    | 1     | 6.733 | 45.4  | 45.4  | 0        | 1 |
| ATM   | c.8285 A>G         | Q2762R                | Class C35 | Class C0  | 0.961 | 29    | 33.7  | 7.16  | 0        | 1 |
| ATM   | c.8481 T>G         | F2827L                | Class C15 | Class C15 | 1     | 25.3  | 12.82 | 12.82 | 0        | 1 |
| ATM   | c.8494 C>T         | R2832C                | Class C65 | Class C45 | 1     | 23.2  | 29.01 | 20.28 | 0        | 1 |
| ATM   | c.8732 C>G         | T2911S                | Class C0  | Class C0  | 0.212 | 14.61 | 3.53  | 3.04  | 0        | 1 |
| ATM   | c.8734 A>G         | R2912G                | Class C65 | Class C65 | 1     | 20.7  | 25.9  | 25.9  | 0.000231 | 1 |
| ATM   | c.8741 T>C         | I2914T                | Class C65 | Class C65 | 1     | 25.1  | 19.6  | 19.6  | 0        | 1 |
| ATM   | c.8773 G>A         | G2925S                | Class C55 | Class C55 | 1     | 35    | 7.5   | 7.5   | 0        | 1 |
| ATM   | c.8938 C>A         | L2980I                | Class C0  | Class C0  | 0.148 | 9.526 | 15.46 | 2.88  | 0        | 1 |
| ATM   | c.9078_9079 insA   | frameshift            | IFD       | IFD       | 1     | 43    | 44.95 | 43.98 | 0        | 1 |
| ATM   | c.9086 G>A         | G3029D                | Class C65 | Class C15 | 0.011 | 12.26 | 35.86 | 37.66 | 0.000308 | 1 |
| ATM   | c.9139 C>T         | R3047X                | IFD       | IFD       | 1     | 50    | 43.98 | 43.98 | 0        | 1 |
| BARD1 | c.33 G>T           | Q11H                  | Class C0  | Class C0  | 0.41  | 13.17 | 2.38  | 2.04  | 0.001608 | 0 |
| BARD1 | c.57 G>C           | E19D                  | Class C0  | Class C0  | 0.083 | 12.36 | 8.64  | 7.82  | 0        | 0 |
| BARD1 | c.73 G>C           | A25P                  | Class C0  | Class C0  | 0.876 | 15.92 | 10.89 | 10.94 | 0        | 0 |
| BARD1 | c.90 T>A           | G30G                  | SYN       | SYN       | 0     | 3.557 | 0.86  | 1.97  | 0.000805 | 1 |
| BARD1 | c.216 -21T>G       | NA                    | intronic  | intronic  | 0     | 4.3   | 0     | 0     | 0        | 0 |

|       |               |       |           |           |       |       |       |       |          |   |
|-------|---------------|-------|-----------|-----------|-------|-------|-------|-------|----------|---|
| BARD1 | c.216 T>C     | C53C  | SYN       | SYN       | 0     | 10.75 | 0.15  | 0.15  | 0        | 1 |
| BARD1 | c.221 G>T     | C74F  | Class C65 | Class C65 | 1     | 19.7  | 21.32 | 21.32 | 0        | 1 |
| BARD1 | c.279 A>G     | Q93Q  | SYN       | SYN       | 0     | 8.479 | 0.62  | 0.94  | 0.000154 | 1 |
| BARD1 | c.281 A>C     | D94A  | Class C65 | Class C65 | 1     | 20    | 29.51 | 29.51 | 0        | 1 |
| BARD1 | c.326 G>A     | S109N | Class C45 | Class C0  | 0.988 | 17.82 | 14.09 | 3.67  | 0        | 1 |
| BARD1 | c.346C>T      | H116Y | Class C35 | Class C0  | 0.006 | 12.26 | 10.85 | 3.25  | 0.000231 | 1 |
| BARD1 | c.348 T>C     | H116H | SYN       | SYN       | 0     | 8.504 | 0.93  | 1.99  | 0.000308 | 1 |
| BARD1 | c.600 A>G     | A200A | SYN       | SYN       | 0     | 0.22  | 3.97  | 5.19  | 0        | 0 |
| BARD1 | c.609 A>C     | G203G | SYN       | SYN       | 0     | 0.36  | 3.1   | 2.25  | 0.008996 | 0 |
| BARD1 | c.632T>C      | L211S | Class C35 | Class C35 | 0.999 | 17.75 | 16.77 | 18.85 | 0        | 0 |
| BARD1 | c.690 C>G     | D230E | Class C0  | Class C0  | 0.028 | 9.815 | 5.24  | 2.86  | 0        | 0 |
| BARD1 | c.716 T>A     | L239Q | Class C0  | Class C0  | 0.014 | 2.114 | 2.22  | 2.87  | 0.000154 | 0 |
| BARD1 | c.722 C>G     | S241C | Class C15 | Class C15 | 0.999 | 13.17 | 1.3   | 2.3   | 0        | 0 |
| BARD1 | c.882 G>A     | R294R | SYN       | SYN       | 0     | 8.827 | 1.72  | 2.4   | 0        | 0 |
| BARD1 | c.1339 C>G    | L447V | Class C25 | Class C25 | 0.998 | 16.89 | 25.8  | 25.8  | 0.000154 | 0 |
| BARD1 | c.1347 A>G    | Q449Q | SYN       | SYN       | 0     | 7.22  | 0.11  | 2.4   | 0.000231 | 0 |
| BARD1 | c.1364 A>G    | N455S | Class C45 | Class C45 | 1     | 18.38 | 13.4  | 13.4  | 0        | 0 |
| BARD1 | c.1395 +50T>C | NA    | intronic  | intronic  | 0     | 5.779 | 0     | 0     | 0.001231 | 0 |
| BARD1 | c.1409 A>G    | N470S | Class C0  | Class C0  | 0.339 | 8.571 | 3.78  | 5.52  | 0        | 0 |
| BARD1 | c.1429 G>A    | V477M | Class C15 | Class C15 | 1     | 24.5  | 24.43 | 24.43 | 0        | 0 |
| BARD1 | c.1491 A>G    | P497P | SYN       | SYN       | 0     | 8.669 | 0.14  | 0.14  | 0        | 0 |
| BARD1 | c.1586 G>A    | R529Q | Class C35 | Class C35 | 0.998 | 10.28 | 14.43 | 14.43 | 0        | 0 |
| BARD1 | c.1613 G>A    | S538N | Class C0  | Class C0  | 0     | 0.007 | 1.25  | 1.43  | 0.000077 | 0 |
| BARD1 | c.1678A>G     | M560V | Class C0  | Class C0  | 0     | 1.319 | 6.31  | 4.65  | 0        | 0 |
| BARD1 | c.1738 G>A    | E580K | Class C0  | Class C0  | 0.041 | 9.977 | 5.4   | 2.55  | 0.004767 | 1 |
| BARD1 | c.1835 A>T    | D612V | Class C35 | Class C0  | 0.015 | 6.447 | 24.1  | 2.69  | 0.000077 | 1 |
| BARD1 | c.1904 -10T>C | NA    | intronic  | intronic  | 0     | 13.96 | 0     | 0     | 0        | 1 |
| BARD1 | c.1933 T>C    | C645R | Class C0  | Class C0  | 0.001 | 2.457 | 5.85  | 2.53  | 0.022913 | 1 |
| BARD1 | c.1955 A>G    | E652G | Class C65 | Class C65 | 1     | 24    | 28.23 | 28.23 | 0        | 1 |
| BARD1 | c.1957 A>G    | I653V | Class C0  | Class C0  | 0.001 | 9.207 | 5.48  | 6.67  | 0        | 1 |
| BARD1 | c.1972 C>T    | R658C | Class C35 | Class C35 | 0.995 | 24    | 23.61 | 20.58 | 0.00592  | 1 |
| BARD1 | c.1977 A>G    | R659R | SYN       | SYN       | 0     | 8.834 | 0.59  | 0.99  | 0.002384 | 1 |
| BARD1 | c.1989 C>T    | N663N | SYN       | SYN       | 0     | 7.497 | 0.09  | 0.09  | 0        | 1 |
| BARD1 | c.2002 -11C>T | NA    | intronic  | intronic  | 0     | 11.61 | 0     | 0     | 0        | 1 |
| BARD1 | c.2161 G>A    | A721T | Class C0  | Class C0  | 0.999 | 17.3  | 13.1  | 15.95 | 0        | 1 |
| BARD1 | c.2191 C>G    | R731G | Class C65 | Class C0  | 0.992 | 19.7  | 25.9  | 3.78  | 0.002076 | 1 |
| BARD1 | c.2212 A>G    | I738V | Class C0  | Class C0  | 0.027 | 9.469 | 5.48  | 6.67  | 0.006689 | 1 |
| BARD1 | c.2235 T>C    | Y745Y | SYN       | SYN       | 0     | 4.321 | 1.16  | 1.36  | 0        | 1 |
| BARD1 | c.2279 C>T    | S760L | Class C65 | Class C65 | 1     | 24.8  | 28.64 | 28.64 | 0        | 0 |
| BARD1 | c.2282 G>A    | S761N | Class C0  | Class C0  | 0.007 | 14.35 | 2.86  | 2.25  | 0.001461 | 0 |

|       |                 |          |           |           |       |       |       |       |          |   |
|-------|-----------------|----------|-----------|-----------|-------|-------|-------|-------|----------|---|
| CHEK2 | c.14C>T         | S5L      | Class C0  | Class C0  | 0.011 | 12.92 | 9.98  | 14.03 | 0.000077 | 1 |
| CHEK2 | c.74T>C         | V25A     | Class C0  | Class C0  | 0     | 0.272 | 4.86  | 2.91  | 0        | 1 |
| CHEK2 | c.254C>T        | P85L     | Class C0  | Class C0  | 0.728 | 12.03 | 26.92 | 2.37  | 0.002384 | 1 |
| CHEK2 | c.283C>T        | R95X     | X         | X         | 1     | 37    | 45.4  | 45.4  | 0        | 1 |
| CHEK2 | c.320 -5T>A     | NA       | intronic  | intronic  | 0     | 11.93 | 0     | 0     | 0.000384 | 1 |
| CHEK2 | c.349A>G        | R117G    | Class C65 | Class C65 | 1     | 19.93 | 25.9  | 25.9  | 0.000154 | 1 |
| CHEK2 | c.381A>G        | E127E    | SYN       | SYN       | 0     | 4.791 | 1.49  | 2.42  | 0        | 1 |
| CHEK2 | c.405delA       | K135delA | FS        | FS        | 1     | 24.3  | 45.4  | 45.4  | 0        | 1 |
| CHEK2 | c.410G>A        | R137Q    | Class C0  | Class C0  | 0.027 | 12.54 | 11.22 | 2.45  | 0.000077 | 1 |
| CHEK2 | c.444+24c>T     | NA       | intronic  | intronic  | 0     | 5.15  | 0     | 0     | 0.001538 | 1 |
| CHEK2 | c.470T>C        | I157T    | Class C65 | Class C25 | 0.514 | 21.1  | 19.6  | 14.55 | 0.001615 | 1 |
| CHEK2 | c.474A>C        | A158A    | SYN       | SYN       | 0     | 11.2  | 1.69  | 1.5   | 0        | 1 |
| CHEK2 | c.474A>G        | A158A    | SYN       | SYN       | 0     | 11.18 | 1.69  | 1.5   | 0        | 1 |
| CHEK2 | c.538C>T        | R180C    | Class C65 | Class C25 | 0.64  | 17.36 | 29.01 | 9.34  | 0.001077 | 1 |
| CHEK2 | c.539G>A        | R180H    | Class C25 | Class C0  | 0.125 | 12.53 | 14.41 | 2.99  | 0        | 1 |
| CHEK2 | c.575C>T        | S192L    | Class C65 | Class C15 | 0.899 | 16.82 | 28.64 | 13.99 | 0        | 1 |
| CHEK2 | c.592+50a>T     | NA       | intronic  | intronic  | 0     | 2.498 | 0     | 0     | 0.002846 | 1 |
| CHEK2 | c.593 -14C>T    | NA       | intronic  | intronic  | 0     | 8.971 | 0     | 0     | 0.000233 | 1 |
| CHEK2 | c.593 -20delTCT | NA       | intronic  | intronic  | 0     | 0     | 0     | 0     | 0        | 1 |
| CHEK2 | c.593 -45T>A    | NA       | intronic  | intronic  | 0     | 5.903 | 0     | 0     | 0        | 1 |
| CHEK2 | c.593-6 InsCCTT | NA       | intronic  | intronic  | 0     | 0     | 0     | 0     | 0        | 1 |
| CHEK2 | c.651A>G        | R217R    | SYN       | SYN       | 0     | 9.542 | 0.14  | 1.36  | 0        | 1 |
| CHEK2 | c.663C>G        | I221M    | Class C0  | Class C0  | 0.953 | 17.5  | 15.7  | 5.14  | 0.000155 | 1 |
| CHEK2 | c.688G>T        | A230S    | Class C65 | Class C15 | 0.076 | 19.88 | 23.39 | 6.45  | 0        | 1 |
| CHEK2 | c.715G>A        | E239K    | Class C55 | Class C15 | 0.985 | 24    | 19.98 | 9.44  | 0.000154 | 1 |
| CHEK2 | c.727T>C        | C243R    | Class C65 | Class C0  | 0.887 | 19.81 | 34.86 | 27.77 | 0.000077 | 1 |
| CHEK2 | c.751A>T        | I251F    | Class C15 | Class C15 | 1     | 25.4  | 10.65 | 10.65 | 0        | 1 |
| CHEK2 | c.792+62 delAA  | NA       | intronic  | intronic  | 0     | 0     | 0     | 0     | 0        | 1 |
| CHEK2 | c.793 -17T>C    | NA       | intronic  | intronic  | 0     | 11.37 | 0     | 0     | 0        | 1 |
| CHEK2 | c.823G>T        | E275X    | X         | X         | 1     | 49    | 45.4  | 45.4  | 0        | 1 |
| CHEK2 | c.847 -10C>G    | NA       | intronic  | intronic  | 0     | 11.2  | 0     | 0     | 0        | 1 |
| CHEK2 | c.911T>C        | M304T    | Class C65 | Class C55 | 0.999 | 19.47 | 25.97 | 18.59 | 0        | 1 |
| CHEK2 | c.917G>C        | G306A    | Class C55 | Class C55 | 1     | 27.3  | 22.05 | 22.05 | 0        | 1 |
| CHEK2 | c.931G>A        | D311N    | Class C0  | Class C0  | 0.005 | 14.33 | 13.96 | 3.26  | 0        | 1 |
| CHEK2 | c.967A>C        | T323P    | Class C35 | Class C0  | 0.995 | 21.3  | 43.72 | 13.2  | 0        | 1 |
| CHEK2 | c.1036C>T       | R346C    | Class C65 | Class C65 | 1     | 21.1  | 29.01 | 29.01 | 0        | 1 |
| CHEK2 | c.1037G>A       | R346H    | Class C25 | Class C25 | 1     | 34    | 14.41 | 14.41 | 0        | 1 |
| CHEK2 | c.1054A>T       | N352Y    | Class C65 | Class C65 | 1     | 25.8  | 20.2  | 20.2  | 0        | 1 |
| CHEK2 | c.1065G>A       | L355L    | SYN       | SYN       | 0     | 4.288 | 0.13  | 0.13  | 0        | 1 |
| CHEK2 | c.1100delC      | T367delC | FS        | FS        | 1     | 42    | 45.4  | 45.4  | 0        | 1 |

|        |               |           |           |           |       |       |       |       |          |   |
|--------|---------------|-----------|-----------|-----------|-------|-------|-------|-------|----------|---|
| CHEK2  | c.1111C>T     | H371Y     | Class C35 | Class C35 | 0.011 | 16.74 | 12.32 | 14.91 | 0        | 1 |
| CHEK2  | c.1138delCT   | L380delCT | FS        | FS        | 1     | 42    | 45.4  | 45.4  | 0        | 1 |
| CHEK2  | c.1182A>T     | E394D     | Class C35 | Class C35 | 1     | 19.09 | 13.31 | 13.31 | 0        | 1 |
| CHEK2  | c.1216C>T     | R406C     | Class C15 | Class C15 | 0.745 | 15.7  | 19.52 | 15.39 | 0        | 1 |
| CHEK2  | c.1253T>G     | F418C     | Class C65 | Class C65 | 1     | 23.3  | 17.91 | 17.91 | 0        | 1 |
| CHEK2  | c.1263delT    | L421delT  | FS        | FS        | 1     | 41    | 45.4  | 45.4  | 0        | 1 |
| CHEK2  | c.1276C>T     | P426S     | Class C65 | Class C65 | 1     | 27.3  | 17.5  | 17.5  | 0        | 1 |
| CHEK2  | c.1312G>T     | D438Y     | Class C65 | Class C25 | 0.999 | 21.2  | 21.06 | 9.42  | 0.000308 | 1 |
| CHEK2  | c.1313A>G     | D438G     | Class C65 | Class C15 | 0.661 | 20.1  | 20.85 | 10.68 | 0        | 1 |
| CHEK2  | c.1336A>G     | N446D     | Class C15 | Class C0  | 0.003 | 9.55  | 29.27 | 3.69  | 0        | 1 |
| CHEK2  | c.1343T>G     | I448S     | Class C65 | Class C65 | 0.124 | 11.73 | 20.83 | 20.83 | 0.006766 | 1 |
| CHEK2  | c.1427C>T     | T476M     | Class C65 | Class C15 | 1     | 19.54 | 29.5  | 23.02 | 0.000401 | 1 |
| CHEK2  | c.1451C>T     | P484L     | Class C65 | Class C65 | 0.999 | 25.8  | 26.92 | 26.92 | 0        | 1 |
| CHEK2  | c.1491T>C     | D497D     | SYN       | SYN       | 0     | 5.179 | 1.88  | 2.95  | 0        | 1 |
| CHEK2  | c.1528C>T     | Q510X     | X         | X         | 1     | 47    | 45.4  | 45.4  | 0        | 1 |
| CHEK2  | c.1534C>G     | L512V     | Class C0  | Class C0  | 0     | 3.416 | 3.1   | 3.33  | 0        | 1 |
| CHEK2  | c.1542 +11T>A | NA        | intronic  | intronic  | 0     | 2.948 | 0     | 0     | 0.022796 | 1 |
| CHEK2  | c.1542 +92A>G | NA        | intronic  | intronic  | 0     | 3.726 | 0     | 0     | 0        | 1 |
| CHEK2  | c.1556G>T     | R519L     | Class C25 | Class C25 | 0.61  | 16.9  | 21.16 | 20.41 | 0        | 1 |
| MRE11A | c.1-42G>A     | NA        | intronic  | intronic  | 0     | 14.46 | 0     | 0     | 0.000077 | 0 |
| MRE11A | c.18A>T       | A6A       | SYN       | SYN       | 0     | 0.694 | 2.55  | 3.32  | 0        | 0 |
| MRE11A | c.19C>G       | L7V       | Class C25 | Class C0  | 0.004 | 8.845 | 25.8  | 6.38  | 0        | 0 |
| MRE11A | c.21-12T>C    | NA        | intronic  | intronic  | 0     | 17.76 | 0     | 0     | 0        | 0 |
| MRE11A | c.21-17C>T    | NA        | intronic  | intronic  | 0     | 15.68 | 0     | 0     | 0        | 0 |
| MRE11A | c.37T>C       | F13L      | Class C15 | Class C0  | 0.402 | 12.79 | 12.82 | 7.26  | 0        | 1 |
| MRE11A | c.120C>T      | L40L      | SYN       | SYN       | 0     | 5.058 | 1.09  | 3.58  | 0.000539 | 1 |
| MRE11A | c.162T>C      | F54F      | SYN       | SYN       | 0     | 8.823 | 0.11  | 0.11  | 0        | 1 |
| MRE11A | c.259C>T      | R87W      | Class C65 | Class C15 | 1     | 17.06 | 22.31 | 11.19 | 0        | 1 |
| MRE11A | c.463C>T      | R155C     | Class C65 | Class C35 | 0.89  | 22.4  | 29.01 | 18.41 | 0        | 1 |
| MRE11A | c.529G>C      | A177P     | Class C25 | Class C25 | 1     | 24.7  | 38.15 | 38.15 | 0        | 1 |
| MRE11A | c.660-7G>T    | NA        | intronic  | intronic  | 0     | 13.4  | 0     | 0     | 0        | 1 |
| MRE11A | c.704A>G      | D235G     | Class C65 | Class C65 | 1     | 25.4  | 20.85 | 20.85 | 0        | 1 |
| MRE11A | c.826C>T      | P276S     | Class C0  | Class C0  | 0.998 | 26.8  | 6.38  | 6.04  | 0        | 1 |
| MRE11A | c.846-12T>C   | NA        | intronic  | intronic  | 0     | 6.496 | 0     | 0     | 0        | 1 |
| MRE11A | c.846-20T>G   | NA        | intronic  | intronic  | 0     | 6.152 | 0     | 0     | 0        | 1 |
| MRE11A | c.940C>T      | L314L     | SYN       | SYN       | 0     | 9.282 | 0.13  | 0.13  | 0.000154 | 1 |
| MRE11A | c.1074A>G     | P358P     | SYN       | SYN       | 0     | 10.64 | 0.14  | 0.14  | 0        | 1 |
| MRE11A | c.1084C>G     | L362V     | Class C25 | Class C25 | 0.856 | 18.34 | 25.8  | 25.8  | 0        | 1 |
| MRE11A | c.1096C>A     | R366R     | SYN       | SYN       | 0     | 13.01 | 0.14  | 0.69  | 0        | 1 |
| MRE11A | c.1238A>G     | N413S     | Class C45 | Class C0  | 0.947 | 19.01 | 13.4  | 4.35  | 0        | 1 |

|        |                           |            |           |           |       |       |       |       |          |   |
|--------|---------------------------|------------|-----------|-----------|-------|-------|-------|-------|----------|---|
| MRE11A | c.1281A>T                 | L427F      | Class C0  | Class C0  | 0.87  | 20.6  | 9.32  | 3.53  | 0        | 1 |
| MRE11A | c.1442C>T                 | T481I      | Class C65 | Class C0  | 0.999 | 29.2  | 33.48 | 10.24 | 0        | 1 |
| MRE11A | c.1443A>G                 | T481T      | SYN       | SYN       | 0     | 9.867 | 0.19  | 1.56  | 0        | 1 |
| MRE11A | c.1462C>T                 | R488C      | Class C65 | Class C65 | 1     | 19.65 | 29.01 | 29.01 | 0.000077 | 0 |
| MRE11A | c.1504C>T                 | R502C      | Class C65 | Class C35 | 0.028 | 16.07 | 29.01 | 17.61 | 0.000077 | 0 |
| MRE11A | c.1508G>A                 | R503H      | Class C0  | Class C0  | 0.007 | 14.93 | 5.75  | 4.35  | 0        | 0 |
| MRE11A | c.1564-18delTCT           | NA         | intronic  | intronic  | 0     | 0     | 0     | 0     | 0        | 0 |
| MRE11A | c.1667A>G                 | N556S      | Class C0  | Class C0  | 0.001 | 7.308 | 3.28  | 2.3   | 0.000462 | 0 |
| MRE11A | c.1811G>A                 | R604H      | Class C0  | Class C0  | 0.002 | 5.527 | 2.66  | 2.54  | 0.000231 | 0 |
| MRE11A | c.1852A>G                 | M618V      | Class C15 | Class C0  | 0.025 | 12.99 | 30.01 | 6.51  | 0.000154 | 0 |
| MRE11A | c.1897C>G                 | R633G      | Class C0  | Class C0  | 0.001 | 6.68  | 5.3   | 7.63  | 0        | 0 |
| MRE11A | c.1927-9C>A               | NA         | intronic  | intronic  | 0     | 4.056 | 0     | 0     | 0        | 0 |
| MRE11A | c.1995-19delTGTGTTTTGTTTT | NA         | intronic  | intronic  | 0     | 0     | 0     | 0     | 0        | 0 |
| MRE11A | c.2049G>A                 | G683G      | SYN       | SYN       | 0     | 0.413 | 0.12  | 0.12  | 0        | 0 |
| MRE11A | c.2054A>G                 | D685G      | Class C35 | Class C0  | 0.191 | 14.43 | 17.47 | 3.63  | 0        | 0 |
| MRE11A | c.2070+2T>A               | NA         | intronic  | intronic  | 0     | 10.44 | 0     | 0     | 0        | 0 |
| MRE11A | c.2109delAAGAAGAAA        | frameshift | IFD       | IFD       | 0     | 13.73 | 37.49 | 31.21 | 0        | 0 |
| MRE11A | c.2113A>G                 | R705G      | Class C15 | Class C0  | 0.1   | 13    | 12.68 | 3.53  | 0        | 0 |
| NBN    | c.1-2C>T                  | NA         | intronic  | intronic  | 0     | 3.515 | 0     | 0     | 0        | 0 |
| NBN    | c.37+3A>T                 | NA         | intronic  | intronic  | 0     | 7.684 | 0     | 0     | 0        | 0 |
| NBN    | c.104T>C                  | I35T       | Class C65 | Class C65 | 0.999 | 22    | 21.74 | 21.62 | 0        | 1 |
| NBN    | c.127C>T                  | R43*       | X         | X         | 1     | 25.3  | 45.4  | 45.4  | 0.000077 | 1 |
| NBN    | c.425A>G                  | N142S      | Class C0  | Class C0  | 0.129 | 11.05 | 7.02  | 4.26  | 0.000077 | 1 |
| NBN    | c.426T>C                  | N142N      | SYN       | SYN       | 0     | 9.874 | 0.54  | 1.4   | 0.000154 | 1 |
| NBN    | c.456G>A                  | M152I      | Class C0  | Class C0  | 0.999 | 24.9  | 21.99 | 21.99 | 0.000077 | 1 |
| NBN    | c.464T>C                  | V155A      | Class C65 | Class C65 | 0.982 | 20.7  | 27.75 | 27.75 | 0        | 1 |
| NBN    | c.591insTTGDe113          | frameshift | FS        | FS        | 1     | 28.9  | 45.4  | 45.4  | 0        | 1 |
| NBN    | c.628G>T                  | V210F      | Class C0  | Class C0  | 0.215 | 12.43 | 7.11  | 5.19  | 0.001001 | 0 |
| NBN    | c.671G>A                  | G224E      | Class C65 | Class C65 | 1     | 21.1  | 35.36 | 35.36 | 0        | 0 |
| NBN    | c.804delGT                | frameshift | FS        | FS        | 1     | 17.34 | 45.4  | 45.4  | 0        | 1 |
| NBN    | c.950T>A                  | M317K      | Class C45 | Class C0  | 0.814 | 14.7  | 31.58 | 25.87 | 0        | 1 |
| NBN    | c.954T>A                  | T318T      | SYN       | SYN       | 0     | 9.618 | 1.2   | 1.78  | 0        | 1 |
| NBN    | c.1065C>T                 | S355S      | SYN       | SYN       | 0     | 0.1   | 0.75  | 0.62  | 0        | 0 |
| NBN    | c.1176A>G                 | K392K      | SYN       | SYN       | 0     | 3.512 | 0.94  | 1.26  | 0        | 0 |
| NBN    | c.1202C>G                 | P401R      | Class C0  | Class C0  | 0.03  | 0.634 | 25.23 | 3.07  | 0        | 0 |
| NBN    | c.1222A>G                 | K408E      | Class C0  | Class C0  | 0.722 | 10.69 | 5.41  | 5.48  | 0.002768 | 0 |
| NBN    | c.1301C>A                 | T434N      | Class C0  | Class C0  | 0.698 | 13.87 | 7.15  | 7.28  | 0        | 0 |
| NBN    | 1398-19delC               | NA         | intronic  | intronic  | 0     | 0     | 0     | 0     | 0        | 0 |
| NBN    | c.1398-9insT              | NA         | intronic  | intronic  | 0     | 0     | 0     | 0     | 0        | 0 |
| NBN    | c.1509T>G                 | N503K      | Class C0  | Class C0  | 0.835 | 13.76 | 2.24  | 1.41  | 0        | 0 |

|       |              |        |           |           |       |       |       |       |          |   |
|-------|--------------|--------|-----------|-----------|-------|-------|-------|-------|----------|---|
| NBN   | c.1720 T>A   | L574I  | Class C0  | Class C0  | 0.085 | 5.199 | 3.58  | 3.72  | 0.000615 | 0 |
| NBN   | c.2235-18C>T | NA     | intronic  | intronic  | 0     | 14.87 | 0     | 0     | 0.0014   | 0 |
| NBN   | c.2235-18C>T | NA     | intronic  | intronic  | 0     | 14.87 | 0     | 0     | 0.0014   | 0 |
| RAD50 | c.24C>T      | S8S    | SYN       | SYN       | 0     | 12.06 | 0.12  | 0.12  | 0.000154 | 1 |
| RAD50 | c.113A>G     | N38S   | Class C45 | Class C45 | 1     | 30    | 13.4  | 13.4  | 0        | 1 |
| RAD50 | c.129G>A     | T43T   | SYN       | SYN       | 0     | 16.26 | 0.19  | 0.19  | 0        | 1 |
| RAD50 | c.250C>G     | L84V   | Class C25 | Class C0  | 1     | 21.4  | 25.8  | 24.81 | 0        | 1 |
| RAD50 | c.260G>A     | R87H   | Class C25 | Class C0  | 0.962 | 15.33 | 14.41 | 10.56 | 0.000154 | 1 |
| RAD50 | c.280A>C     | I94L   | Class C0  | Class C0  | 0     | 15.56 | 7.01  | 8.94  | 0.003537 | 1 |
| RAD50 | c.379G>A     | V127I  | Class C25 | Class C0  | 0.999 | 20.1  | 11.96 | 5.57  | 0.001768 | 1 |
| RAD50 | c.412C>T     | R138X  | X         | X         | 1     | 36    | 45.4  | 45.4  | 0        | 1 |
| RAD50 | c.511G>T     | A171S  | Class C65 | Class C0  | 0.098 | 13.15 | 23.39 | 2.22  | 0        | 0 |
| RAD50 | c.552-1G>A   | NA     | intronic  | intronic  | 0     | 19.33 | 0     | 0     | 0        | 0 |
| RAD50 | c.572C>T     | T191I  | Class C65 | Class C0  | 0.584 | 19.41 | 33.48 | 5.11  | 0.004536 | 1 |
| RAD50 | c.597A>C     | Q199H  | Class C15 | Class C0  | 1     | 19.09 | 14.36 | 14.01 | 0        | 0 |
| RAD50 | c.671G>A     | R224H  | Class C0  | Class C0  | 1     | 20.5  | 8.23  | 1.81  | 0.000615 | 0 |
| RAD50 | c.715G>C     | E239Q  | Class C0  | Class C0  | 0.978 | 16.98 | 13.82 | 2.73  | 0        | 0 |
| RAD50 | c.741A>G     | E247E  | SYN       | SYN       | 0     | 7.999 | 0.92  | 1.95  | 0        | 0 |
| RAD50 | c.756+5C>T   | NA     | intronic  | intronic  | 0     | 1.684 | 0     | 0     | 0        | 0 |
| RAD50 | c.756+6delT  | NA     | intronic  | intronic  | 0     | 0     | 0     | 0     | 0        | 0 |
| RAD50 | c.757-12C>A  | NA     | intronic  | intronic  | 0     | 9.495 | 0     | 0     | 0        | 0 |
| RAD50 | c.785T>G     | L262H  | Class C65 | Class C0  | 0.202 | 24    | 20.32 | 3.17  | 0.000077 | 0 |
| RAD50 | c.885+5G>A   | NA     | intronic  | intronic  | 0     | 13.35 | 0     | 0     | 0        | 0 |
| RAD50 | c.921A>G     | L307L  | SYN       | SYN       | 0     | 7.949 | 1.28  | 1.71  | 0.000538 | 0 |
| RAD50 | c.943G>T     | V315L  | Class C25 | Class C0  | 0.777 | 21.8  | 20.81 | 4.73  | 0.001999 | 0 |
| RAD50 | c.980G>A     | R327H  | Class C25 | Class C0  | 0.994 | 27.7  | 14.41 | 3.66  | 0.002384 | 0 |
| RAD50 | c.1094G>A    | R365Q  | Class C0  | Class C0  | 0.013 | 15.29 | 5.73  | 2.03  | 0.000308 | 0 |
| RAD50 | c.1246-10A>G | NA     | intronic  | intronic  | 0     | 0.022 | 0     | 0     | 0        | 0 |
| RAD50 | c.1277A>G    | Q426R  | Class C35 | Class C35 | 0.992 | 24.2  | 33.7  | 33.7  | 0.000308 | 0 |
| RAD50 | c.1336A>G    | K446E  | Class C55 | Class C0  | 1     | 24.7  | 23.7  | 16.55 | 0.000154 | 0 |
| RAD50 | c.1456C>T    | R486C  | Class C25 | Class C15 | 0.752 | 17.94 | 20.93 | 7.76  | 0.000077 | 0 |
| RAD50 | c.1670C>G    | S557C  | Class C15 | Class C0  | 0.996 | 20    | 18.06 | 5.44  | 0        | 0 |
| RAD50 | c.1713C>T    | P571P  | SYN       | SYN       | 0     | 9.889 | 0.14  | 0.78  | 0        | 0 |
| RAD50 | c.1794-59A>C | NA     | intronic  | intronic  | 0     | 12.18 | 0     | 0     | 0        | 0 |
| RAD50 | c.1875C>G    | Y625X  | X         | X         | 1     | 37    | 45.4  | 45.4  | 0        | 1 |
| RAD50 | c.1878A>G    | E626E  | SYN       | SYN       | 0     | 8.423 | 0.16  | 1.17  | 0        | 0 |
| RAD50 | c.1911T>A    | D637E  | Class C35 | Class C0  | 0.972 | 21.3  | 23.98 | 5.93  | 0.000154 | 1 |
| RAD50 | c.2025C>T    | D675D  | SYN       | SYN       | 0     | 7.498 | 0.15  | 2.97  | 0.028141 | 1 |
| RAD50 | c.2047G>A    | V683I  | Class C25 | Class C0  | 0.635 | 15.23 | 11.96 | 1.48  | 0.000077 | 1 |
| RAD50 | c.2054delAG  | Q685fs | FS        | FS        | 1     | 38    | 45.4  | 45.4  | 0        | 1 |

|       |                  |         |           |           |       |       |       |       |          |   |
|-------|------------------|---------|-----------|-----------|-------|-------|-------|-------|----------|---|
| RAD50 | c.2091C>T        | V697V   | SYN       | SYN       | 0     | 9.127 | 0.74  | 3.96  | 0.001153 | 1 |
| RAD50 | c.2163A>G        | K721K   | SYN       | SYN       | 0     | 9.862 | 1.5   | 1.54  | 0        | 1 |
| RAD50 | c.2173C>T        | R725W   | Class C65 | Class C35 | 0.981 | 23.3  | 22.31 | 18.98 | 0.000077 | 1 |
| RAD50 | c.2283A>G        | I761M   | Class C0  | Class C0  | 0.212 | 11.68 | 15.7  | 9.86  | 0        | 0 |
| RAD50 | c.2288G>A        | R763H   | Class C0  | Class C0  | 0.004 | 15.11 | 5.06  | 2.36  | 0.000154 | 0 |
| RAD50 | c.2397G>C        | Q799H   | Class C15 | Class C0  | 0.966 | 24.3  | 14.36 | 5.57  | 0.000384 | 0 |
| RAD50 | c.2525T>C        | V842A   | Class C65 | Class C0  | 0.048 | 13.26 | 27.75 | 5.55  | 0.000308 | 0 |
| RAD50 | c.2750C>T        | T917I   | Class C15 | Class C0  | 0.001 | 12.85 | 6.59  | 2.73  | 0        | 0 |
| RAD50 | c.2837A>T        | D946V   | Class C35 | Class C0  | 0.029 | 11.58 | 23.09 | 6.45  | 0        | 0 |
| RAD50 | c.2841T>C        | I947I   | SYN       | SYN       | 0     | 8.619 | 0.1   | 1.42  | 0        | 0 |
| RAD50 | c.2910C>T        | D970D   | SYN       | SYN       | 0     | 7.222 | 0.9   | 2.49  | 0.004204 | 0 |
| RAD50 | c.2938del5       | L980fs  | FS        | FS        | 1     | 41    | 45.4  | 45.4  | 0        | 1 |
| RAD50 | c.3036+37T>C     | NA      | intronic  | intronic  | 0     | 7.01  | 0     | 0     | 0        | 0 |
| RAD50 | c.3036+5G>A      | NA      | intronic  | intronic  | 0     | 11.14 | 0     | 0     | 0.000616 | 0 |
| RAD50 | c.3037-3T>C      | NA      | intronic  | intronic  | 0     | 9.988 | 0     | 0     | 0.006    | 0 |
| RAD50 | c.3153G>A        | L1051L  | SYN       | SYN       | 0     | 7.995 | 0.13  | 1.65  | 0.004154 | 0 |
| RAD50 | c.3165-4A>T      | NA      | intronic  | intronic  | 0     | 7.717 | 0     | 0     | 0.000923 | 0 |
| RAD50 | c.3165-8T>G      | NA      | intronic  | intronic  | 0     | 2.824 | 0     | 0     | 0.002693 | 0 |
| RAD50 | c.3239G>A        | G1080D  | Class C65 | Class C0  | 0.804 | 25.4  | 35.86 | 9.73  | 0        | 0 |
| RAD50 | c.3260A>G        | H1087R  | Class C0  | Class C0  | 0     | 4.723 | 7.03  | 0.97  | 0        | 0 |
| RAD50 | c.3278G>A        | R1093Q  | Class C35 | Class C0  | 0.265 | 17.12 | 14.43 | 2.45  | 0        | 0 |
| RAD50 | c.3311A>G        | Y1104C  | Class C25 | Class C25 | 0.942 | 20.6  | 8.34  | 7.58  | 0        | 0 |
| RAD50 | c.3363G>T        | L1121L  | SYN       | SYN       | 0     | 8.752 | 0.13  | 0.13  | 0        | 1 |
| RAD50 | c.3476-12delITTC | NA      | intronic  | intronic  | 0     | 0     | 0     | 0     | 0        | 0 |
| RAD50 | c.3496C>T        | R1166W  | Class C65 | Class C0  | 0.999 | 24.4  | 22.31 | 4.79  | 0        | 1 |
| RAD50 | c.3790C>T        | L1264F  | Class C15 | Class C15 | 1     | 32    | 12.59 | 12.59 | 0        | 1 |
| RAD50 | c.3836G>A        | R1279H  | Class C25 | Class C0  | 0.982 | 33    | 14.41 | 3.6   | 0.000154 | 1 |
| RAD50 | c.3852delGAAA    | E1284fs | IFD       | IFD       | 1     | 38    | 44.34 | 40.7  | 0        | 1 |
| RAD50 | c.3879C>T        | I1293I  | SYN       | SYN       | 0     | 7.962 | 1.86  | 1.91  | 0.003306 | 1 |
| RAD50 | c.3902A>G        | K1301R  | Class C0  | Class C0  | 0.001 | 15.75 | 2.1   | 2.07  | 0        | 0 |
| RAD51 | c.-1 dupA        | unknown | intronic  | intronic  | 0     | 14.41 | 0     | 0     | 0        | 1 |
| RAD51 | c.-2 -19A>G      | NA      | intronic  | intronic  | 0     | 5.169 | 0     | 0     | 0.000461 | 1 |
| RAD51 | c.108 C>T        | N36N    | SYN       | SYN       | 0     | 9.624 | 2.26  | 1.34  | 0.000077 | 1 |
| RAD51 | c.414 T>C        | H138H   | SYN       | SYN       | 0     | 16.07 | 0.12  | 0.54  | 0        | 1 |
| RAD51 | c.449 G>A        | R150Q   | Class C0  | Class C0  | 0     | 9.975 | 2.33  | 1.54  | 0.001384 | 1 |
| RAD51 | c.531 -31C>T     | NA      | intronic  | intronic  | 0     | 6.909 | 0     | 0     | 0        | 1 |
| RAD51 | c.645 G>A        | R215R   | SYN       | SYN       | 0     | 14.49 | 2.4   | 1.06  | 0.000154 | 1 |
| RAD51 | c.671 C>G        | A224G   | Class C0  | Class C0  | 0.927 | 35    | 9.35  | 5.58  | 0.000077 | 1 |
| RAD51 | c.720 C>G        | A240A   | SYN       | SYN       | 0     | 10.47 | 2.04  | 1.83  | 0.000154 | 1 |
| RAD51 | c.895 +33G>A     | NA      | intronic  | intronic  | 0     | 0     | 0     | 0     | 0        | 1 |



|       |                                   |       |           |           |       |       |       |       |          |   |
|-------|-----------------------------------|-------|-----------|-----------|-------|-------|-------|-------|----------|---|
| RAD51 | c.895 +5delG                      | NA    | intronic  | intronic  | 0     | 0     | 0     | 0     | 0        | 1 |
| RAD51 | c.976 A>G                         | M326V | Class C0  | Class C0  | 0     | 5.798 | 11.2  | 4.53  | 0        | 1 |
| RINT1 | c.43-12delTTC                     | NA    | intronic  | intronic  | 0     | 0     | 0     | 0     | 0.0092   | 1 |
| RINT1 | c.43-20C>G                        | NA    | intronic  | intronic  | 0     | 9.827 | 0     | 0     | 0        | 1 |
| RINT1 | c.177C>T                          | F59F  | SYN       | SYN       | 0     | 12.21 | 0.11  | 1.24  | 0.000154 | 1 |
| RINT1 | c.281C>G                          | T94R  | Class C65 | Class C65 | 1     | 20.7  | 37.76 | 37.76 | 0        | 1 |
| RINT1 | c.301A>G                          | K101E | Class C55 | Class C0  | 0.935 | 16.27 | 23.7  | 5.97  | 0        | 1 |
| RINT1 | c.319T>G                          | L107V | Class C25 | Class C0  | 0.985 | 16.48 | 25.8  | 7.33  | 0        | 1 |
| RINT1 | c.376C>T                          | H126Y | Class C0  | Class C0  | 0.028 | 6.361 | 2.26  | 2.87  | 0.000308 | 1 |
| RINT1 | c.388G>A                          | A130T | Class C0  | Class C0  | 0.01  | 9.408 | 8.8   | 3.32  | 0.000538 | 1 |
| RINT1 | c.399C>T                          | S133S | SYN       | SYN       | 0     | 1.297 | 1.38  | 0.94  | 0.000077 | 1 |
| RINT1 | c.413C>T                          | A138V | Class C65 | Class C0  | 0.234 | 13.92 | 35.49 | 6.61  | 0.000384 | 1 |
| RINT1 | c.501A>T                          | Q167H | Class C15 | Class C0  | 0.014 | 13.52 | 14.36 | 3.51  | 0        | 1 |
| RINT1 | c.543C>T                          | T181T | SYN       | SYN       | 0     | 9.692 | 0.19  | 1.51  | 0        | 1 |
| RINT1 | c.690-15A>G                       | NA    | intronic  | intronic  | 0     | 0.019 | 0     | 0     | 0.000077 | 1 |
| RINT1 | c.732C>T                          | I244I | SYN       | SYN       | 0     | 6.717 | 1.15  | 0.68  | 0.006074 | 1 |
| RINT1 | c.736C>A                          | P246T | Class C0  | Class C0  | 0.418 | 12.74 | 4.45  | 2.64  | 0        | 1 |
| RINT1 | c.778G>T                          | A260S | Class C0  | Class C0  | 0     | 4.759 | 4.31  | 2.16  | 0        | 1 |
| RINT1 | c.782C>T                          | P261L | Class C65 | Class C0  | 0.001 | 7.221 | 26.92 | 2.69  | 0.000154 | 1 |
| RINT1 | c.891T>C                          | P297P | SYN       | SYN       | 0     | 8.597 | 0.14  | 1.81  | 0        | 1 |
| RINT1 | c.1025T>C                         | M342T | Class C45 | Class C0  | 0.003 | 7.485 | 22.41 | 2.88  | 0.000308 | 1 |
| RINT1 | c.1121G>A                         | R374Q | Class C35 | Class C35 | 1     | 36    | 14.43 | 14.43 | 0        | 1 |
| RINT1 | c.1256C>G                         | P419R | Class C0  | Class C0  | 0.997 | 17.98 | 27.5  | 27.41 | 0.000077 | 1 |
| RINT1 | c.1270A>T                         | S424C | Class C15 | Class C15 | 0.034 | 14.35 | 5.02  | 6.25  | 0        | 1 |
| RINT1 | c.1334-5delA, c.1334-1_1335delGTT | IFR   | IFD       | IFD       | 1     | 21.2  | 43.15 | 43.15 | 0        | 1 |
| RINT1 | c.1377C>T                         | A459A | SYN       | SYN       | 0     | 10.56 | 0.23  | 0.23  | 0.000154 | 1 |
| RINT1 | c.1385C>T                         | S462L | Class C65 | Class C15 | 0.997 | 18.39 | 28.64 | 16.77 | 0        | 1 |
| RINT1 | c.1428A>G                         | P476P | SYN       | SYN       | 0     | 10.1  | 0.14  | 1.06  | 0        | 1 |
| RINT1 | c.1449G>T                         | M483I | Class C0  | Class C0  | 0.105 | 14.59 | 21.99 | 21.99 | 0        | 1 |
| RINT1 | c.1453C>T                         | L485L | SYN       | SYN       | 0     | 6.03  | 0.13  | 0.13  | 0        | 1 |
| RINT1 | c.1465A>G                         | I489V | Class C0  | Class C0  | 0.212 | 16.67 | 9.59  | 9.87  | 0        | 1 |
| RINT1 | c.1519G>A                         | E507K | Class C55 | Class C0  | 0.837 | 23.9  | 19.98 | 4.73  | 0.000077 | 1 |
| RINT1 | c.1562C>T                         | T521I | Class C65 | Class C0  | 0.969 | 19.98 | 33.48 | 10.08 | 0        | 1 |
| RINT1 | c.1656T>C                         | D552D | SYN       | SYN       | 0     | 9.369 | 0.15  | 1.38  | 0        | 1 |
| RINT1 | c.1672-3C>T                       | NA    | intronic  | intronic  | 0     | 12.25 | 0     | 0     | 0        | 1 |
| RINT1 | c.1949C>T                         | P650L | Class C65 | Class C15 | 0.997 | 14.16 | 26.92 | 14.45 | 0        | 1 |
| RINT1 | c.1962G>A                         | T654T | SYN       | SYN       | 0     | 0.01  | 0.91  | 2.3   | 0.001384 | 1 |
| RINT1 | c.1985T>C                         | L662S | Class C65 | Class C55 | 0.997 | 23.9  | 22.76 | 19.82 | 0.000154 | 1 |
| RINT1 | c.2003T>C                         | F668S | Class C55 | Class C0  | 0.015 | 10.68 | 16.4  | 2.6   | 0.003767 | 1 |
| RINT1 | c.2036T>C                         | V679A | Class C0  | Class C0  | 0     | 5.292 | 6.42  | 1.83  | 0        | 1 |

|       |                 |       |           |           |       |       |       |       |          |   |
|-------|-----------------|-------|-----------|-----------|-------|-------|-------|-------|----------|---|
| RINT1 | c.2067+6T>A     | NA    | intronic  | intronic  | 0     | 10.85 | 0     | 0     | 0.008381 | 1 |
| RINT1 | c.2090A>G       | N697S | Class C45 | Class C45 | 0.966 | 21.6  | 13.4  | 13.4  | 0        | 1 |
| RINT1 | c.2128C>T       | R710W | Class C65 | Class C65 | 1     | 21.2  | 22.31 | 22.31 | 0        | 1 |
| RINT1 | c.2159G>T       | C720F | Class C65 | Class C0  | 0.999 | 23.3  | 21.32 | 17.68 | 0        | 1 |
| RINT1 | c.2176T>C       | Y726H | Class C65 | Class C35 | 0.866 | 24.3  | 16.52 | 17.35 | 0.000231 | 1 |
| RINT1 | c.2179T>C       | F727L | Class C15 | Class C15 | 0.998 | 32    | 12.82 | 12.82 | 0        | 1 |
| RINT1 | c.2184A>G       | K728K | SYN       | SYN       | 0     | 12.4  | 0.14  | 0.14  | 0.000077 | 1 |
| RINT1 | c.2193A>G       | K731K | SYN       | SYN       | 0     | 8.839 | 0.14  | 0.14  | 0        | 1 |
| RINT1 | c.2253G>T       | L751L | SYN       | SYN       | 0     | 6.883 | 0.13  | 1.03  | 0        | 1 |
| RINT1 | c.2276C>T       | P759L | Class C25 | Class C15 | 0.015 | 17.59 | 24.42 | 22.59 | 0.006766 | 1 |
| RINT1 | c.2361G>A       | W787* | IFD       | IFD       | 1     | 40    | 43.98 | 43.98 | 0        | 1 |
| RINT1 | c.2362C>T       | P788S | Class C65 | Class C0  | 0.999 | 27.8  | 17.5  | 3.71  | 0        | 1 |
| XRCC2 | c.1-1G>A        | NA    | Class C65 | Class C65 | 1     | 13.74 | 36.3  | 36.3  | 0        | 1 |
| XRCC2 | c.40-16T>C      | NA    | intronic  | intronic  | 0     | 14.8  | 0     | 0     | 0.001231 | 1 |
| XRCC2 | c.46G>T         | A16S  | Class C65 | Class C0  | 0.584 | 15.35 | 23.39 | 8.62  | 0        | 1 |
| XRCC2 | c.49C>T         | R17X  | X         | X         | 1     | 37    | 45.4  | 45.4  | 0        | 1 |
| XRCC2 | c.181C>A        | L61I  | Class C0  | Class C0  | 0.604 | 17.26 | 15.46 | 15.46 | 0        | 1 |
| XRCC2 | c.271C>T        | R91W  | Class C65 | Class C65 | 1     | 14.77 | 22.31 | 22.31 | 0        | 1 |
| XRCC2 | c.283A>G        | I95V  | Class C0  | Class C0  | 0.013 | 0.61  | 3.96  | 5.81  | 0.000231 | 1 |
| XRCC2 | c.651_652delITG | C217X | IFD       | IFD       | 1     | 11.76 | 43.98 | 43.98 | 0        | 1 |
| XRCC2 | c.693G>T        | W231C | Class C65 | Class C65 | 1     | 16.34 | 29.05 | 29.05 | 0        | 1 |
| XRCC2 | c.808T>G        | F270V | Class C45 | Class C45 | 1     | 19.47 | 17.61 | 17.61 | 0.002692 | 1 |

<sup>a</sup>PMSAs include protein sequences from Human through *Ornithorynchus anatinus*; <sup>b</sup>3 S/P=3 substitutions per position: Human through 3 substitutions per position pMSA depth, which was different for each gene: *ATM*, *Brachiostoma floridae*; *BARD1*, *Xenopus*; *CHEK2*, *Danio rerio*; *MRE11A*, *Brachiostoma floridae*; *NBN*, *Anolis carolinensis*; *RAD50*, *Drosophila melanogaster*; *RAD51*, *Arabidopsis thaliana*; *RINT1*, *Strongylocentrotus purpuratus*; *XRCC2*, *Danio rerio*;

**Supplemental Table 2.** A listing of the regions used for the domain boundaries rMS inclusion  
Summed Length

| Genes         | mRNA Assession | Protein Assession | Gene Length, a | Summed Length of Domain, a | Domain Region                                                                          |
|---------------|----------------|-------------------|----------------|----------------------------|----------------------------------------------------------------------------------------|
| <i>ATM</i>    | NM_000051.3    | NP_000042.3       | 3056           | 1,097 (36%)                | 1960+ (includes FAT and FATC)                                                          |
| <i>BARD1</i>  | NM_000465.3    | NP_000456.2       | 777            | 273 (35%)                  | 26-119 (RING & BRCA1 interaction); 568-748 (BRCT)                                      |
| <i>CHEK2</i>  | NM_007194.3    | NP_009125.1       | 543            | 543 (100%)                 | Entire Gene                                                                            |
| <i>RAD51</i>  | NM_002875.4    | NP_002866.2       | 339            | 339 (100%)                 | Entire Gene                                                                            |
| <i>RINT1</i>  | NM_021930.4    | NP_068749.3       | 792            | 792 (100%)                 | Entire Gene                                                                            |
| <i>XRCC2</i>  | NM_005431.1    | NP_005422.1       | 280            | 280 (100%)                 | Entire Gene                                                                            |
| <i>MRE11A</i> | NM_005591.3    | NP_005582.1       | 708            | 497 (70%)                  | 13-482 (Phosphoesterase; RAD50 interaction); 568-594 (GAR)                             |
| <i>RAD50</i>  | NM_005732.3    | NP_005723.2       | 1312           | 455 (35%)                  | 3-166 (ATPase); 189-198 (MRE11A interaction); 635-734 (Zinc hook); 1117-1297 (ATPase)  |
| <i>NBN</i>    | NM_002485.4    | NP_002476.2       | 754            | 369 (49%)                  | 1-110 (FHA); 111-206 & 227-334 (BRCT); 640-662, 681-691 & 734-754 (MRE11A interaction) |

**Supplemental Table 3.** ROC curve estimates for each variant classifier

| Variant Classifier: pMSA depth           | Observation | AUC    |
|------------------------------------------|-------------|--------|
| Align-GVGD: M <sup>a</sup>               | 416         | 0.5926 |
| Align-GVGD: 3 S/P <sup>b</sup>           | 416         | 0.6025 |
| MAPP: M <sup>a</sup>                     | 416         | 0.5817 |
| MAPP: 3 S/P <sup>b</sup>                 | 416         | 0.6000 |
| CADD                                     | 416         | 0.6235 |
| Polyphen2                                | 416         | 0.5941 |
| All Rare Variants                        | 416         | 0.5105 |
| All Rare Variants in Domains             | 416         | 0.5596 |
| Truncations and Splice Junction Variants | 416         | 0.5193 |

<sup>a</sup>M=Mammals: Human through *Ornithorynchus anatinus* pMSA depth; <sup>b</sup>3 S/P=3 substitutions per position: Human through 3 substitutions per position pMSA depth, which was different for each gene: *ATM*, *Brachiostoma floridae*; *BARD1*, *Xenopus*; *CHEK2*, *Latimeria chalumnae*; *MRE11A*, *Brachiostoma floridae*; *NBN*, *Anolis carolinensis*; *RAD50*, *Drosophila melanogaster*; *RAD51*, *Arabidopsis thaliana*; *RINT1*, *Strongylocentrotus purpuratus*; *XRCC2*, *Danio rerio*; <sup>c</sup>X=*Xenopus*: Human through *Xenopus* pMSA depth.

**Supplemental Figure 1. ROC curves for each variant classifier.** <sup>a</sup>M=Mammals: Human through *Ornithorynchus anatinus* pMSA depth; <sup>b</sup>3S/P: Human through 3M pMSA depth, which was different for each gene: *ATM*, *Brachiostoma floridae*; *BARD1*, *Xenopus*; *CHEK2*, *Danio rerio*; *MRE11A*, *Brachiostoma floridae*; *NBN*, *Anolis carolinensis*; *RAD50*, *Drosophila melanogaster*; *RAD51*, *Arabidopsis thaliana*; *RINT1*, *Strongylocentrotus purpuratus*; *XRCC2*, *Danio rerio*; <sup>c</sup>X=Xenopus: Human through *Xenopus* pMSA depth. T+SJV: Truncations and Splice Junction Variants

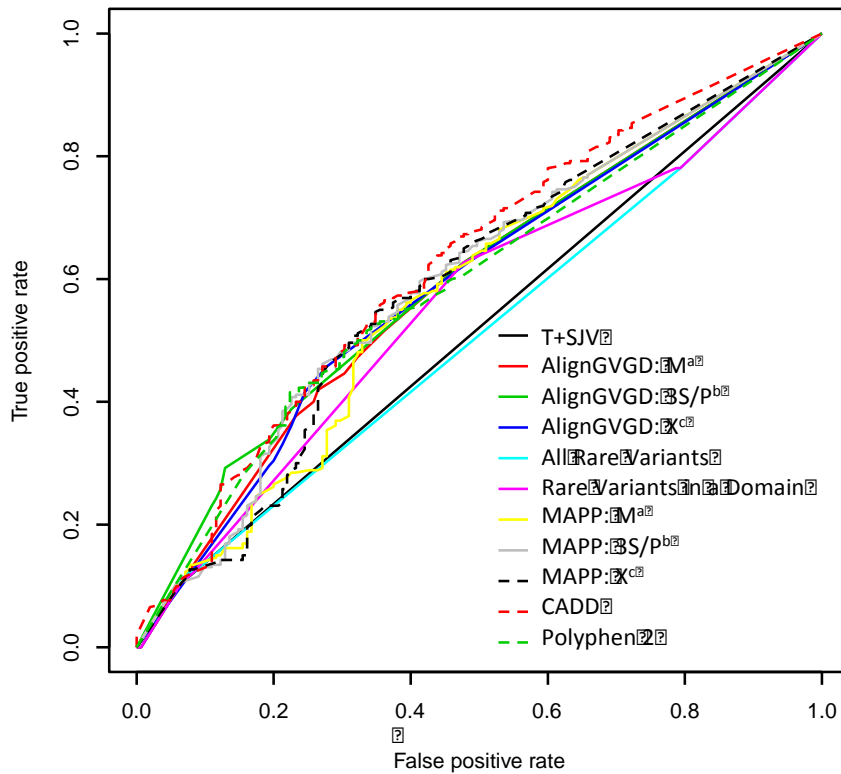

**Supplemental Table 4.** Correlations between missense analysis programs for rare key-domain missense variants. Adjusted R<sup>2</sup> and (P-values).

|                         | MAPP <sup>a</sup>             | CADD                         | Polyphen-2                    | Synthetic Consensus           |
|-------------------------|-------------------------------|------------------------------|-------------------------------|-------------------------------|
| Align-GVGD <sup>a</sup> | 0.43(8.84X10 <sup>-18</sup> ) | 0.19(8.40X10 <sup>-8</sup> ) | 0.27(1.07X10 <sup>-10</sup> ) | 0.64(4.07X10 <sup>-31</sup> ) |
| MAPP <sup>a</sup>       | X                             | 0.15(3.18X10 <sup>-6</sup> ) | 0.26(2.49X10 <sup>-10</sup> ) | 0.47(2.81X10 <sup>-20</sup> ) |
| CADD                    | X                             | X                            | 0.56(2.36X10 <sup>-25</sup> ) | 0.55(8.62X10 <sup>-25</sup> ) |
| Polyphen-2              | X                             | X                            | X                             | 0.59(1.84X10 <sup>-27</sup> ) |

<sup>a</sup>Protein Multiple Sequence Alignments were from Human through 3S/P

**Supplemental Table 5.** Combined Odds Ratio Estimates from Case-Control Mutation Screening of ATM, CHEK2, and NBN

| Analysis                                         | Distinct Variants | Control(%)   | Case(%)      | Adjusted OR <sup>a</sup> (CI) | P-value               |
|--------------------------------------------------|-------------------|--------------|--------------|-------------------------------|-----------------------|
| Noncarrier                                       | 43                | 1,054(94.02) | 1,192(91.90) | Reference                     |                       |
| Carrier of Rare Missense Outside of Domain       | 19                | 22(1.96)     | 9(0.69)      | 0.33(0.15-0.74)               | 7.28X10 <sup>-3</sup> |
| Carrier of Truncation or Splice Junction Variant | 17                | 6(0.54)      | 24(1.85)     | 4.20(1.69-10.44)              | 0.0020                |
| Rare Missense Substitutions: MAPP                |                   |              |              |                               |                       |
| rMS < 11                                         | 29                | 21(1.87)     | 22(1.70)     | 1.08(0.58-2.02)               | 0.8104                |
| rMS ≥ 11                                         | 45                | 18(1.61)     | 50(3.86)     | 2.73(1.56-4.79)               | 4.55X10 <sup>-4</sup> |
| Rare Missense Substitutions: Align-GVGD          |                   |              |              |                               |                       |
| rMS < C35                                        | 46                | 31(2.77)     | 42(3.24)     | 1.47(0.90-2.40)               | 0.1234                |
| rMS ≥ C35                                        | 28                | 8(0.71)      | 30(2.31)     | 3.19(1.43-7.13)               | 4.65X10 <sup>-3</sup> |
| Rare Missense Substitutions: CADD                |                   |              |              |                               |                       |
| rMS < 23                                         | 51                | 29(2.59)     | 48(3.70)     | 1.59(0.98-2.60)               | 0.0611                |
| rMS ≥ 23                                         | 23                | 10(0.89)     | 24(1.85)     | 2.60(1.22-5.57)               | 0.0136                |
| Rare Missense Substitutions: PolyPhen-2          |                   |              |              |                               |                       |
| rMS < 0.9                                        | 35                | 22(1.96)     | 28(2.16)     | 1.32(0.73-2.38)               | 0.3556                |
| rMS ≥ 0.9                                        | 39                | 17(1.52)     | 44(3.39)     | 2.51(1.40-4.49)               | 1.96X10 <sup>-3</sup> |
| <b>Total</b>                                     | <b>153</b>        | <b>1,121</b> | <b>1,297</b> |                               |                       |

<sup>a</sup>Adjusted for race/ethnicity and study center; CI=95% Confidence Interval

**Supplemental Table 6. Missense Analysis Program Overlap**

| Variant Classifier                          | Control (%) | rMS/T+SJV | Case (%) | rMS/T+SJV | Adjusted OR <sup>a</sup> | (CI)         | P-Value               |
|---------------------------------------------|-------------|-----------|----------|-----------|--------------------------|--------------|-----------------------|
| <b>Only NBN, CHEK2, and ATM</b>             |             |           |          |           |                          |              |                       |
| Carrier of T+SJV                            | 6 (0.5)     |           | 24 (1.9) |           | 4.20                     | (1.69-10.44) | 0.0020                |
| One or More                                 | 23 (2.1)    | 3.83      | 52 (4.0) | 2.17      | 2.22                     | (1.33-3.72)  | 0.0023                |
| Two or More                                 | 13 (1.2)    | 2.17      | 37 (2.9) | 1.54      | 2.59                     | (1.35-5.00)  | 0.0044                |
| Three or More                               | 11 (1.0)    | 1.83      | 31 (2.4) | 1.29      | 2.77                     | (1.36-5.63)  | 0.0050                |
| All Four                                    | 2 (0.2)     | 0.33      | 12 (0.9) | 0.50      | 6.14                     | (1.34-28.14) | 0.0194                |
| <b>BARD1-MRE11A-RAD50-RAD51-RINT1-XRCC2</b> |             |           |          |           |                          |              |                       |
| Carrier of T+SJV                            | 3 (0.3)     |           | 3 (0.2)  |           | 1.07                     | (0.20-5.60)  | 0.9401                |
| One or More                                 | 13 (1.2)    | 4.33      | 44 (3.4) | 14.67     | 2.53                     | (1.33-4.83)  | 0.0047                |
| Two or More                                 | 5 (0.4)     | 1.67      | 34 (2.6) | 11.33     | 4.90                     | (1.87-12.84) | 0.0012                |
| Three or More                               | 3 (0.3)     | 1.00      | 21 (1.6) | 7.00      | 5.25                     | (1.52-18.14) | 0.0088                |
| All Four                                    | 0 (0.0)     | 0.00      | 8 (0.6)  | 2.67      |                          |              | <0.000 <sup>a</sup>   |
| <b>All Nine Genes</b>                       |             |           |          |           |                          |              |                       |
| Carrier of T+SJV                            | 9 (0.8)     |           | 27 (2.1) |           | 3.31                     | (1.53-7.16)  | 2.36X10 <sup>-3</sup> |
| One or More                                 | 34 (3.0)    | 5.67      | 93 (7.2) | 3.88      | 2.37                     | (1.57-3.60)  | 4.56X10 <sup>-5</sup> |
| Two or More                                 | 18 (1.6)    | 3.00      | 70 (5.4) | 2.92      | 3.18                     | (1.85-5.46)  | 2.68X10 <sup>-5</sup> |
| Three or More                               | 14 (1.2)    | 2.33      | 52 (4.0) | 2.17      | 3.27                     | (1.77-6.04)  | 1.51X10 <sup>-4</sup> |
| All Four                                    | 2 (0.2)     | 0.33      | 20 (1.5) | 0.83      | 8.61                     | (1.96-37.81) | 4.35X10 <sup>-3</sup> |

<sup>a</sup> P-value from Fisher's Exact Test



**Supplemental Table 7.** Excluding a single gene from the 9 gene ensemble

| Variant Classifier     | Control (%)   | rMS/T+SJV | Case (%)      | rMS/T+SJV | Adjusted OR <sup>a</sup> | (CI)         | P-Value  |
|------------------------|---------------|-----------|---------------|-----------|--------------------------|--------------|----------|
| <b>Dropping BARD1</b>  |               |           |               |           |                          |              |          |
| Non-carrier            | 1,014 (90.45) |           | 1,140 (87.90) |           | Reference                |              |          |
| rMS Outside of Domain  | 50 (4.46)     |           | 44 (3.39)     |           | 0.77                     | (0.50-1.18)  | 0.2298   |
| Carrier of T+SJV       | 6 (0.54)      |           | 10 (0.77)     |           | 1.80                     | (0.63-5.15)  | 0.2718   |
| rMS Inside of Domain   |               |           |               |           |                          |              |          |
| Align-GVGD             | 9 (0.80)      | 1.50      | 35 (2.70)     | 3.50      | 3.25                     | (1.52-6.96)  | 0.0024   |
| MAPP                   | 20 (1.78)     | 3.33      | 56 (4.32)     | 5.60      | 2.42                     | (1.42-4.15)  | 0.0012   |
| CADD                   | 15 (1.34)     | 2.50      | 42 (3.24)     | 4.20      | 2.48                     | (1.34-4.58)  | 0.0038   |
| Polyphen2              | 25 (2.23)     | 4.17      | 63 (4.86)     | 6.30      | 2.13                     | (1.31-3.47)  | 0.0024   |
| Overlap of Two         | 16 (1.43)     | 2.67      | 53 (4.09)     | 5.30      | 2.82                     | (1.58-5.06)  | 4.84E-04 |
| <b>Dropping MRE11A</b> |               |           |               |           |                          |              |          |
| Non-carrier            | 994 (88.67)   |           | 1,098 (84.66) |           | Reference                |              |          |
| rMS Outside of Domain  | 55 (4.91)     |           | 44 (3.39)     |           | 0.75                     | (0.49-1.15)  | 0.1868   |
| Carrier of T+SJV       | 9 (0.80)      |           | 27 (2.08)     |           | 3.24                     | (1.49-7.01)  | 0.0029   |
| rMS Inside of Domain   |               |           |               |           |                          |              |          |
| Align-GVGD             | 11 (0.98)     | 1.22      | 48 (3.70)     | 1.78      | 3.58                     | (1.81-7.05)  | 2.37E-04 |
| MAPP                   | 25 (2.23)     | 2.78      | 74 (5.71)     | 2.74      | 2.69                     | (1.67-4.34)  | 4.82E-05 |
| CADD                   | 15 (1.34)     | 1.67      | 44 (3.39)     | 1.63      | 2.68                     | (1.45-4.93)  | 1.60E-03 |
| Polyphen2              | 30 (2.68)     | 3.33      | 76 (5.86)     | 2.81      | 2.25                     | (1.44-3.52)  | 3.67E-04 |
| Overlap of Two         | 18 (1.61)     | 2.00      | 62 (4.78)     | 2.30      | 2.96                     | (1.71-5.12)  | 9.96E-05 |
| <b>Dropping RAD50</b>  |               |           |               |           |                          |              |          |
| Non-carrier            | 1,016 (90.63) |           | 1,125 (86.74) |           | Reference                |              |          |
| rMS Outside of Domain  | 37 (3.30)     |           | 22 (1.70)     |           | 0.54                     | (0.31-0.94)  | 0.0298   |
| Carrier of T+SJV       | 6 (0.54)      |           | 25 (1.93)     |           | 4.53                     | (1.83-11.23) | 0.0011   |
| rMS Inside of Domain   |               |           |               |           |                          |              |          |
| Align-GVGD             | 10 (0.89)     | 1.67      | 46 (3.55)     | 1.84      | 3.79                     | (1.87-7.69)  | 2.22E-04 |
| MAPP                   | 24 (2.14)     | 4.00      | 72 (5.55)     | 2.88      | 2.71                     | (1.67-4.41)  | 5.85E-05 |
| CADD                   | 13 (1.16)     | 2.17      | 40 (3.08)     | 1.60      | 2.97                     | (1.55-5.68)  | 0.0010   |
| Polyphen2              | 25 (2.23)     | 4.17      | 71 (5.47)     | 2.84      | 2.55                     | (1.58-4.11)  | 1.34E-04 |
| Overlap of Two         | 17 (1.52)     | 2.83      | 60 (4.63)     | 2.40      | 3.01                     | (1.72-5.28)  | 1.18E-04 |
| <b>Dropping RAD51</b>  |               |           |               |           |                          |              |          |
| Non-carrier            | 1,000 (89.21) |           | 1,096 (84.50) |           | Reference                |              |          |
| rMS Outside of Domain  | 49 (4.37)     |           | 40 (3.08)     |           | 0.75                     | (0.48-1.16)  | 0.1940   |
| Carrier of T+SJV       | 9 (0.80)      |           | 27 (2.08)     |           | 3.31                     | (1.53-7.16)  | 0.0024   |
| rMS Inside of Domain   |               |           |               |           |                          |              |          |
| Align-GVGD             | 11 (0.98)     | 1.22      | 49 (3.78)     | 1.81      | 3.62                     | (1.84-7.13)  | 2.02E-04 |
| MAPP                   | 26 (2.32)     | 2.89      | 78 (6.01)     | 2.89      | 2.63                     | (1.65-4.21)  | 5.28E-05 |

|                       |       |         |      |       |         |      |           |             |          |
|-----------------------|-------|---------|------|-------|---------|------|-----------|-------------|----------|
| CADD                  | 14    | (1.25)  | 1.56 | 48    | (3.70)  | 1.78 | 3.05      | (1.64-5.67) | 4.25E-04 |
| Polyphen2             | 27    | (2.41)  | 3.00 | 81    | (6.25)  | 3.00 | 2.57      | (1.63-4.07) | 5.47E-05 |
| Overlap of Two        | 17    | (1.52)  | 1.89 | 70    | (5.40)  | 2.59 | 3.38      | (1.95-5.87) | 1.54E-05 |
| <hr/>                 |       |         |      |       |         |      |           |             |          |
| Dropping RINT1        |       |         |      |       |         |      |           |             |          |
| Non-carrier           | 1,009 | (90.01) |      | 1,121 | (86.43) |      | Reference |             |          |
| rMS Outside of Domain | 50    | (4.46)  |      | 41    | (3.16)  |      | 0.72      | (0.46-1.12) | 0.1428   |
| Carrier of T+SJV      | 9     | (0.80)  |      | 27    | (2.08)  |      | 3.26      | (1.51-7.05) | 0.0027   |
| rMS Inside of Domain  |       |         |      |       |         |      |           |             |          |
| Align-GVGD            | 9     | (0.80)  | 1.00 | 42    | (3.24)  | 1.56 | 3.75      | (1.78-7.90) | 5.02E-04 |
| MAPP                  | 22    | (1.96)  | 2.44 | 68    | (5.24)  | 2.52 | 2.72      | (1.64-4.52) | 1.06E-04 |
| CADD                  | 13    | (1.16)  | 1.44 | 39    | (3.01)  | 1.44 | 2.85      | (1.48-5.48) | 0.0017   |
| Polyphen2             | 24    | (2.14)  | 2.67 | 69    | (5.32)  | 2.56 | 2.48      | (1.52-4.04) | 2.69E-04 |
| Overlap of Two        | 16    | (1.43)  | 1.78 | 61    | (4.70)  | 2.26 | 3.14      | (1.77-5.58) | 9.12E-05 |
| <hr/>                 |       |         |      |       |         |      |           |             |          |
| Dropping XRCC2        |       |         |      |       |         |      |           |             |          |
| Non-carrier           | 1,010 | (90.10) |      | 1,106 | (85.27) |      | Reference |             |          |
| rMS Outside of Domain | 45    | (4.01)  |      | 40    | (3.08)  |      | 0.81      | (0.51-1.27) | 0.3561   |
| Carrier of T+SJV      | 9     | (0.80)  |      | 26    | (2.00)  |      | 3.14      | (1.44-6.81) | 0.0039   |
| rMS Inside of Domain  |       |         |      |       |         |      |           |             |          |
| Align-GVGD            | 11    | (0.98)  | 1.22 | 45    | (3.47)  | 1.73 | 3.31      | (1.67-6.56) | 6.11E-04 |
| MAPP                  | 21    | (1.87)  | 2.33 | 70    | (5.40)  | 2.69 | 2.84      | (1.70-4.75) | 6.56E-05 |
| CADD                  | 10    | (0.89)  | 1.11 | 44    | (3.39)  | 1.69 | 3.66      | (1.80-7.45) | 3.49E-04 |
| Polyphen2             | 21    | (1.87)  | 2.33 | 72    | (5.55)  | 2.77 | 2.82      | (1.70-4.70) | 6.50E-05 |
| Overlap of Two        | 13    | (1.16)  | 1.44 | 63    | (4.86)  | 2.42 | 3.83      | (2.06-7.12) | 2.11E-05 |

<sup>a</sup>Adjusted for ethnicity and study center. OR=Odds Ratio; CI=95% Confidence Interval; rMS=rare missense substitution; T+SJV = Truncation or Splice Junction Variant.

**Supplemental Table 8.** Previously reported associated SNPs and corresponding breast cancer risk in the multiple papers used for reference in comparison of our dataset and risk estimates for non-Caucasians.

| Locus    | SNP        | Allele <sup>a</sup> | Caucasian <sup>h</sup> |                   |              | Recent African Ancestry <sup>j</sup> |                   |              | Latina <sup>k</sup> |                   |                   |              | East Asian <sup>l</sup> |                   |              |
|----------|------------|---------------------|------------------------|-------------------|--------------|--------------------------------------|-------------------|--------------|---------------------|-------------------|-------------------|--------------|-------------------------|-------------------|--------------|
|          |            |                     | MAF <sup>b</sup>       | OR <sup>c</sup>   | Observed MAF | AF <sup>d</sup>                      | OR <sup>c</sup>   | Observed MAF | AF <sup>d</sup>     | Heterozygous OR   | Homozygous OR     | Observed MAF | AF <sup>d</sup>         | OR <sup>c</sup>   | Observed MAF |
| 1p11.2   | rs11249433 | A/G                 | 0.40                   | 1.09              | 0.45         | 0.101                                | 1.07              | 0.16         |                     | 1.13 <sup>f</sup> |                   | 0.27         | 0.03                    | 1.16              | 0.06         |
| CASP8    | rs1045485  | G/C                 | 0.13                   | 0.97              | 0.12         |                                      | 0.97 <sup>g</sup> | 0.05         |                     | 0.97 <sup>g</sup> |                   | 0.06         |                         | 0.97 <sup>g</sup> | 0.00         |
| 2q35     | rs13387042 | A/G                 | 0.49                   | 0.88              | 0.46         | 0.251                                | 1.01 <sup>c</sup> | 0.30         | 0.67                | 0.85 <sup>e</sup> | 0.67 <sup>c</sup> | 0.59         | 0.90                    | 0.94              | 0.88         |
| SLC4A7   | rs4973768  | C/T                 | 0.47                   | 1.10              | 0.49         | 0.35                                 | 1.06              | 0.39         |                     | 1.11 <sup>f</sup> |                   | 0.59         | 0.19                    | 1.11              | 0.23         |
| 5p12     | rs10941679 | A/G                 | 0.25                   | 1.13              | 0.26         | 0.189                                | 0.94              | 0.22         |                     | 1.11 <sup>f</sup> |                   | 0.36         | 0.48                    | 1.08              | 0.53         |
| MAP3K1   | rs889312   | A/C                 | 0.28                   | 1.12              | 0.28         | 0.34                                 | 0.93              | 0.33         | 0.43                | 1.04              | 1.09              | 0.41         | 0.52                    | 1.05 <sup>c</sup> | 0.43         |
| ESR1     | rs2046210  | G/A                 | 0.41                   | 1.08              | 0.38         | 0.627                                | 1.02              | 0.58         |                     | 1.18 <sup>f</sup> |                   | 0.33         | 0.34                    | 1.27              | 0.39         |
| 8q24     | rs13281615 | A/G                 | 0.41                   | 1.09              | 0.42         | 0.44                                 | 1.00              | 0.44         |                     | 1.06 <sup>f</sup> |                   | 0.60         | 0.52                    | 1.03              | 0.51         |
| CDKN2A/B | rs1011970  | G/T                 | 0.17                   | 1.06              | 0.18         | 0.342                                | 0.90              | 0.26         |                     | 1.06 <sup>f</sup> |                   | 0.33         | 0.08                    | 1.06              | 0.12         |
| ANKRD16  | rs2380205  | C/T                 | 0.44                   | 0.98              | 0.38         | 0.584                                | 1.03 <sup>e</sup> | 0.57         |                     | 0.98 <sup>f</sup> |                   | 0.28         | 0.11                    | 0.98              | 0.13         |
| ZNF365   | rs10995190 | G/A                 | 0.16                   | 0.86              | 0.18         | 0.168                                | 1.14 <sup>e</sup> | 0.17         |                     | 0.96 <sup>f</sup> |                   | 0.10         | 0.02                    | 1.06              | 0.04         |
| ZMIZ1    | rs704010   | C/T                 | 0.38                   | 1.08              | 0.40         | 0.076                                | 1.04              | 0.08         |                     | 1.07 <sup>f</sup> |                   | 0.45         | 0.29                    | 1.05 <sup>c</sup> | 0.40         |
| FGFR2    | rs2981578  | T/C                 | 0.50 <sup>i</sup>      | 1.24 <sup>i</sup> | 0.48         | 0.871                                | 1.24              | 0.86         |                     | 1.22 <sup>f</sup> |                   | 0.52         |                         | 1.19 <sup>j</sup> | 0.62         |
| LSP1     | rs3817198  | T/C                 | 0.31                   | 1.07              | 0.33         | 0.159                                | 0.85              | 0.17         | 0.20                | 1.02              | 1.20              | 0.21         | 0.13                    | 1.07              | 0.10         |
| 11q13    | rs614367   | C/T                 | 0.15                   | 1.21              | 0.15         | 0.128                                | 1.09              | 0.15         |                     | 1.25 <sup>f</sup> |                   | 0.08         |                         | 1.29              | 0.03         |
| RAD51L1  | rs999737   | C/T                 | 0.23                   | 0.92              | 0.23         | 0.033                                | 1.07 <sup>e</sup> | 0.06         | 0.17                | 1.01              | 1.17              | 0.18         | 0.00                    | 1.08              | 0.00         |
| TOX3     | rs3803662  | G/A                 | 0.26                   | 1.24              | 0.29         | 0.516                                | 0.96              | 0.42         | 0.41                | 1.27              | 1.25              | 0.42         | 0.64                    | 1.15 <sup>c</sup> | 0.54         |
| COX11    | rs6504950  | G/A                 | 0.28                   | 0.94              | 0.28         | 0.346                                | 1.11 <sup>e</sup> | 0.35         |                     | 0.96 <sup>f</sup> |                   | 0.21         | 0.07                    | 0.98              | 0.15         |

<sup>a</sup>Major/Minor Allele; <sup>b</sup>MAF=Minor Allele Frequency in controls; <sup>c</sup>OR=Per allele OR; <sup>d</sup>AF=Risk Allele Frequency; <sup>e</sup>The alternative allele was determined as the risk allele, so the reciprocal of the published OR was used; <sup>f</sup>Latian OR = (Caucasian OR + East Asian OR)/2; <sup>g</sup>Minority OR could not be found, so Caucasian was used; <sup>h</sup>Michailidou, K. *et al.* (2013). N=10,052 cases and 12575 controls; <sup>i</sup>Meyer, K. B. *et al.* (2013). N=89,050 Caucasians, N=13,983 East Asians; <sup>j</sup>Huo, D. *et al.* (2012). N= 1509 cases and 1383 controls; <sup>k</sup>Fejerman, L. *et al.* (2013). N= 603 cases and 730 controls; <sup>l</sup>Zheng, W. *et al.* (2013). N= 6,000+ cases and 6,000+ controls
